# Supplementary material for: Nanosecond kinetics of multiphoton upconversion in an optically trapped single microcrystal
Source: Royal Society of Chemistry journal article supplement (doi:10.1039/d2tc01288j), 2022-01-01
Supplement: d2tc01288j1.pdf [file d2tc01288j1.pdf]

## Supplementary information of

### Nanosecond kinetics of multiphoton upconversion in an optically trapped single microcrystal

Hanchang Huang,<sup>ac</sup> Maohui Yuan,<sup>adc</sup> Shuai Hu,<sup>a</sup> Yanyi Zhong,<sup>a</sup> Wenda Cui,<sup>ac</sup> Chuan Guo,<sup>\*ac</sup> Changqing Song,<sup>ac</sup> Guomin Zhao,<sup>ac</sup> and Kai Han<sup>\*ab</sup>

<sup>a</sup>College of Advanced Interdisciplinary Studies, National University of Defense Technology, Changsha 410073, China E-mail: hankai0071@nudt.edu.cn

<sup>b</sup>State Key Laboratory of Pulsed Power Laser Technology, Hefei 230037, China

<sup>c</sup>Hunan Provincial Key Laboratory of High Energy Laser Technology, Changsha 410073, China

<sup>d</sup>Department of physics and chemistry, PLA Army Academy of Special Operations, Guangzhou 510507, China

<sup>e</sup>These authors contributed equally to this work and should be considered co-first authors.

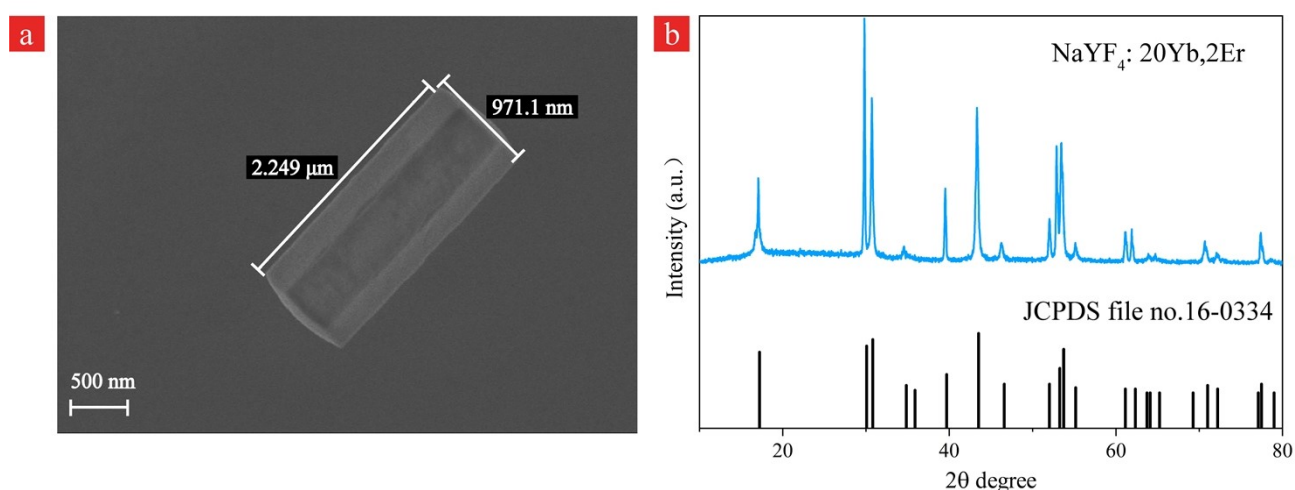

**Fig. S1** (a) SEM micrographs of  $\beta$ -NaYF<sub>4</sub>: Yb/Er (20/2%) microcrystals. (b) XRD patterns of the  $\beta$ -NaYF<sub>4</sub>:Yb/Er (20/2%) microcrystals compared to the known peaks of the hexagonal phase of NaYF<sub>4</sub>.

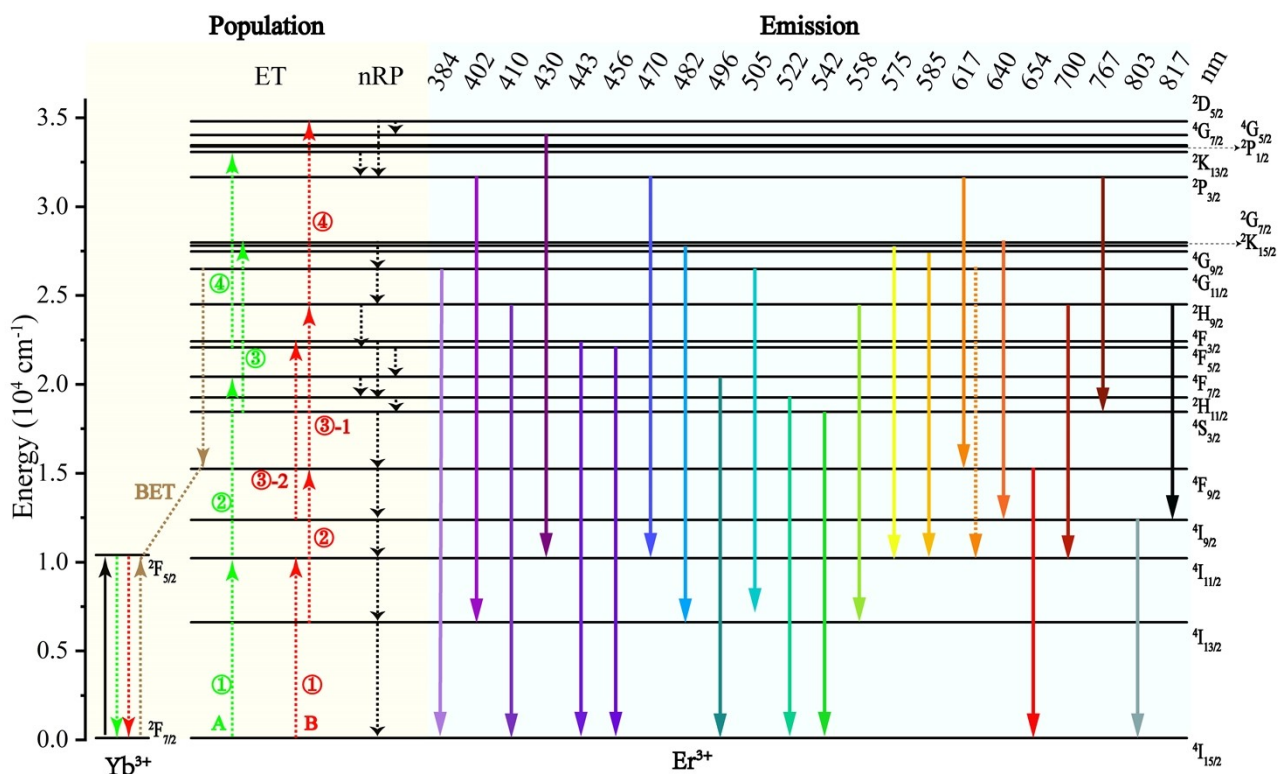

**Fig. S2** Energy level scheme of the Yb³⁺–Er³⁺ ions under 976 nm excitation. The population processes, non-radiative transitions, radiative transitions of the Er³⁺ ions are also provided.

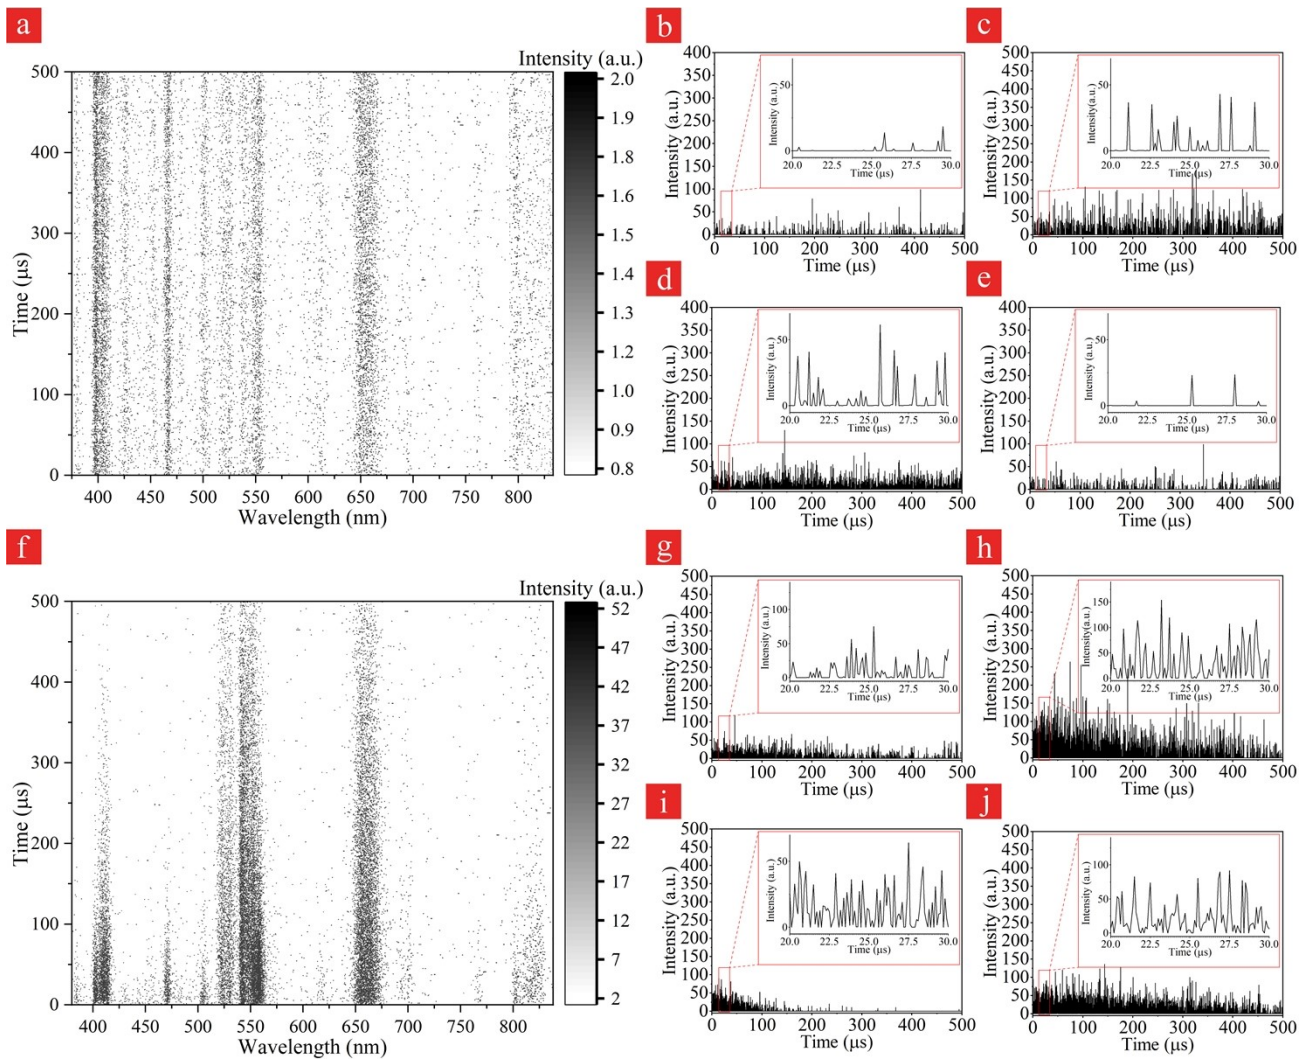

**Fig. S3** Temporal spectra within 500  $\mu$ s of different excitation. The spectra are acquired by a gate width with an integration time of 100 ns. The wavelength resolution of the spectra is 0.21 nm. (a) Temporal spectra under continuous excitation. (b-e) Time trace of UCL under continuous excitation with a different central wavelength and the bandwidth is 6 nm. (f) Temporal spectra under pulsed excitation. For nanosecond pulse excitation, the 0 moment is the time of the pulse excitation. (g-j) Time trace of UCL under pulsed excitation with a different central wavelength and the bandwidth is 6 nm.

Table S1 Comparison of the luminescence lifetimes for Er<sup>3+</sup> doped in different host.

| Transitions                                                     | $\lambda_{em}$ (nm) | Lifetime (ms)                                 |                                                        |                                                                          |          |
|-----------------------------------------------------------------|---------------------|-----------------------------------------------|--------------------------------------------------------|--------------------------------------------------------------------------|----------|
|                                                                 |                     | Er/Yb-codoped<br>phosphate glass <sup>1</sup> | Er <sup>3+</sup> -doped<br>fluoride glass <sup>2</sup> | Er/Yb-codoped<br>NaY(WO <sub>4</sub> ) <sub>2</sub> crystal <sup>3</sup> | Our work |
| <sup>4</sup> F <sub>9/2</sub> → <sup>4</sup> I <sub>15/2</sub>  | 654                 | 0.88                                          | 0.938                                                  | 0.26                                                                     | 0.175    |
| <sup>4</sup> S <sub>3/2</sub> → <sup>4</sup> I <sub>15/2</sub>  | 542                 | 0.56                                          | 0.949                                                  | 0.329                                                                    | 0.269    |
| <sup>2</sup> H <sub>11/2</sub> → <sup>4</sup> I <sub>15/2</sub> | 522                 | 0.12                                          | 0.265                                                  | 0.0241                                                                   | 0.172    |
| <sup>4</sup> G <sub>11/2</sub> → <sup>4</sup> I <sub>15/2</sub> | 384                 |                                               | 0.072                                                  | 0.0067                                                                   | 0.026    |
| <sup>4</sup> G <sub>11/2</sub> → <sup>4</sup> I <sub>13/2</sub> | 505                 |                                               |                                                        |                                                                          | 0.023    |
| <sup>2</sup> H <sub>9/2</sub> → <sup>4</sup> I <sub>13/2</sub>  | 410                 |                                               | 0.4                                                    | 0.108                                                                    | 0.084    |
| <sup>2</sup> H <sub>9/2</sub> → <sup>4</sup> I <sub>13/2</sub>  | 558                 |                                               |                                                        |                                                                          | 0.081    |
| <sup>2</sup> P <sub>3/2</sub> → <sup>4</sup> I <sub>13/2</sub>  | 402                 |                                               |                                                        |                                                                          | 0.043    |
| <sup>2</sup> P <sub>3/2</sub> → <sup>4</sup> I <sub>11/2</sub>  | 470                 |                                               |                                                        |                                                                          | 0.041    |

## Notes and references

- [1] D. K. Sardar, J. B. Gruber, B. Zandi, J. A. Hutchinson and C. W. Trussell, *J. Appl. Phys.*, 2003, **93**, 2041-2046.  
 [2] D. G. O'Shea, J. M. Ward, B. J. Shortt, M. Mortier, P. Féron and S. N. Chormaic, *EPJ Appl. Phys.*, 2007, **40**, 181-188.  
 [3] Z. X. Cheng, S. J. Zhang, F. Song, H. C. Guo, J. R. Han and H. C. Chen, *J. Phys. Chem. Solids*, 2002, **63**, 2011-2017.
